# Supplementary material for: Clinicopathological relevance of tumor expression of NK group 2 member D ligands in resected non-small cell lung cancer
Source: PubMed Central journal article supplement (PMC6887580; doi:10.18632/oncotarget.27308), 2019-11-26
Supplement: oncotarget-10-6805-s001.pdf [file oncotarget-10-6805-s001.pdf]

## Clinicopathological relevance of tumor expression of NK group 2 member D ligands in resected non-small cell lung cancer

### SUPPLEMENTARY MATERIALS

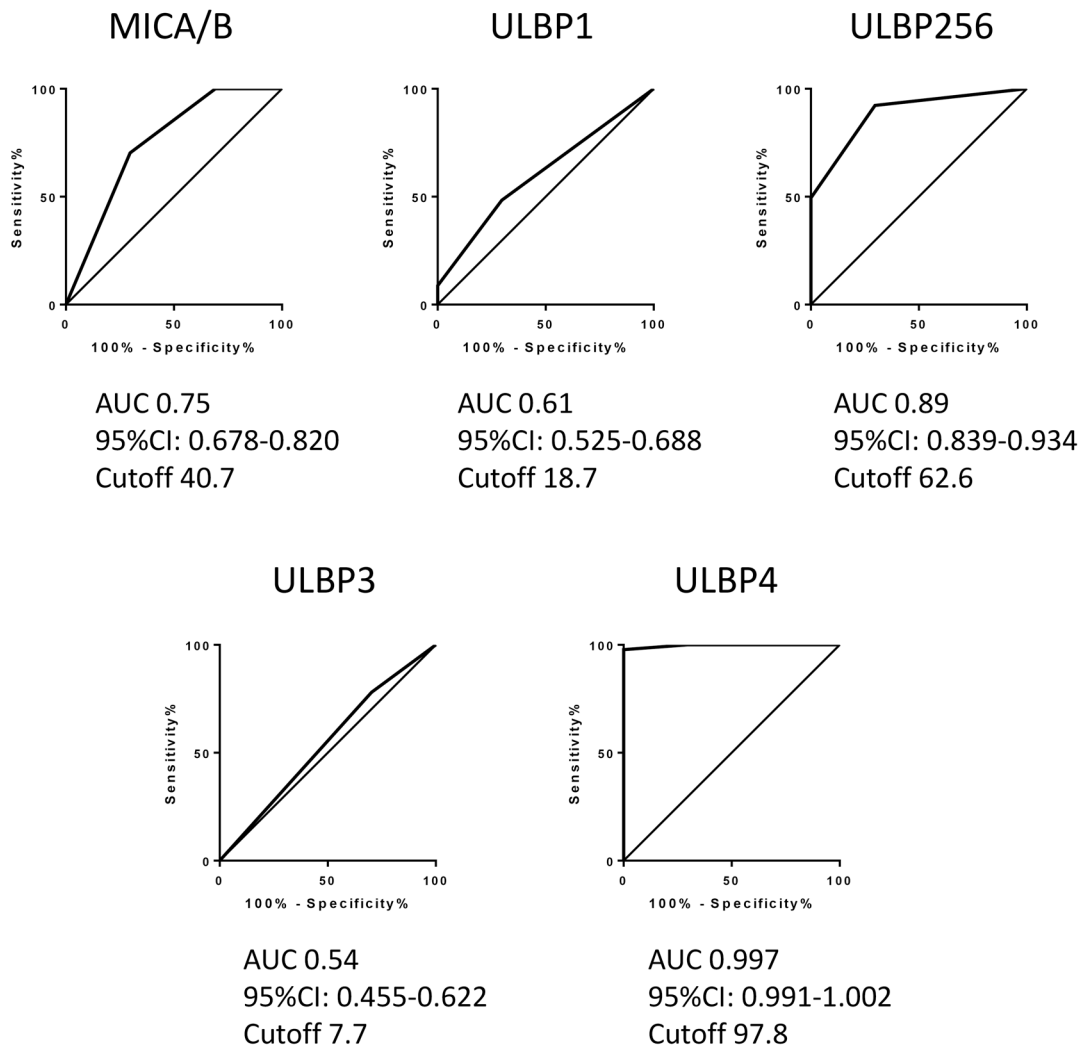

**Supplementary Figure 1: Receiver operating characteristics (ROC) curve for predicting recurrence free survival.**  
AUC: Area under the curve, CI: Confidence interval.

**Supplementary Table 1: Patient and tumor characteristics (n=91)**

---

|                                                |              |
|------------------------------------------------|--------------|
| Age, years (range)                             | 67.8 (37-83) |
| Gender (male/female)                           | 59/32        |
| Smoking (never/current or former) <sup>a</sup> | 33/57        |
| Histology (Ad/Sq)                              | 71/20        |
| Pleural invasion (0/1-3)                       | 59/32        |
| Lymphatic invasion (0/1-3)                     | 66/25        |
| Vascular invasion (0/1-3)                      | 54/37        |
| Lymphnode metastasis (N0/N1-3)                 | 72/19        |
| Pathological Stage (IA/IB-III A)               | 35/56        |
| Postoperative Recurrence (-/+)                 | 64/27        |

---

<sup>a</sup>: Data not available for one patient.

**Supplementary Table 2: Antibodies used in immunohistochemical reaction**

| Antigen   | Species | Clonality | Clone   | Catalog number | Vendor      | Dilution | Antigen retrieval condition |                   | negative control | Positive control            |
|-----------|---------|-----------|---------|----------------|-------------|----------|-----------------------------|-------------------|------------------|-----------------------------|
|           |         |           |         |                |             |          | method                      | Retrival solution |                  |                             |
| MICA/B    | mouse   | mono      | D-8     | sc-271535      | Santa Cruz  | 1:50     |                             |                   |                  | MPM tissue                  |
| ULBP1     | mouse   | mono      | 3F1     | sc-53131       | Santa Cruz  | 1:100    | heating the slides          | citrate buffer    | omit             | LC tissue                   |
| ULBP2/5/6 | goat    | poly      | -       | AF1298         | R&D systems | 1:20     |                             |                   |                  | MPM tissue                  |
| ULBP3     | mouse   | mono      | D-1     | sc-390844      | Santa Cruz  | 1:100    | 3 times at 100°C            | (pH6)             | primary Ab       | bronchus (internal control) |
| ULBP4     | mouse   | mono      | #709116 | MAB6285        | R&D systems | 1:200    |                             |                   |                  | LC tissue                   |

Ab: antibody, MPM: malignant pleural mesothelioma, LC: lung cancer
